# Supplementary material for: Staphylococcus aureus produces pain through pore-forming toxins and neuronal TRPV1 that is silenced by QX-314
Source: PubMed Central journal article supplement (PMC5750211; doi:10.1038/s41467-017-02448-6), 2018-01-02
Supplement: 41467_2017_2448_MOESM1_ESM.pdf [file 41467_2017_2448_MOESM1_ESM.pdf]

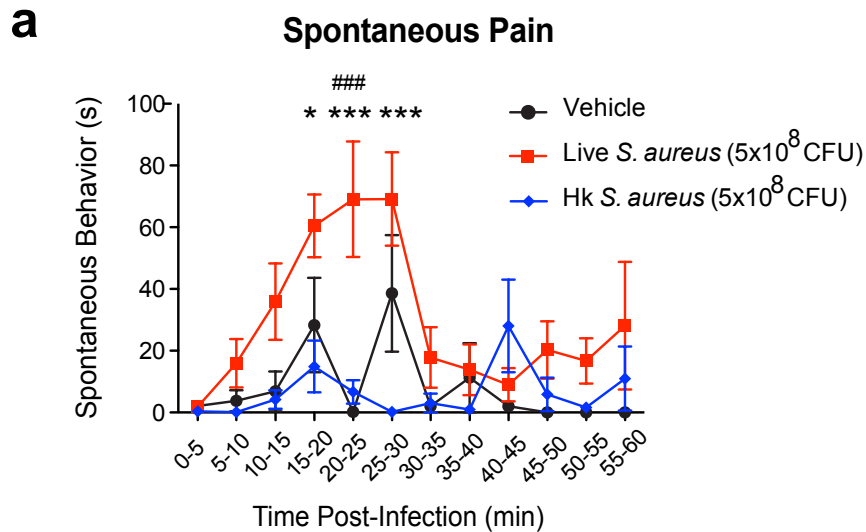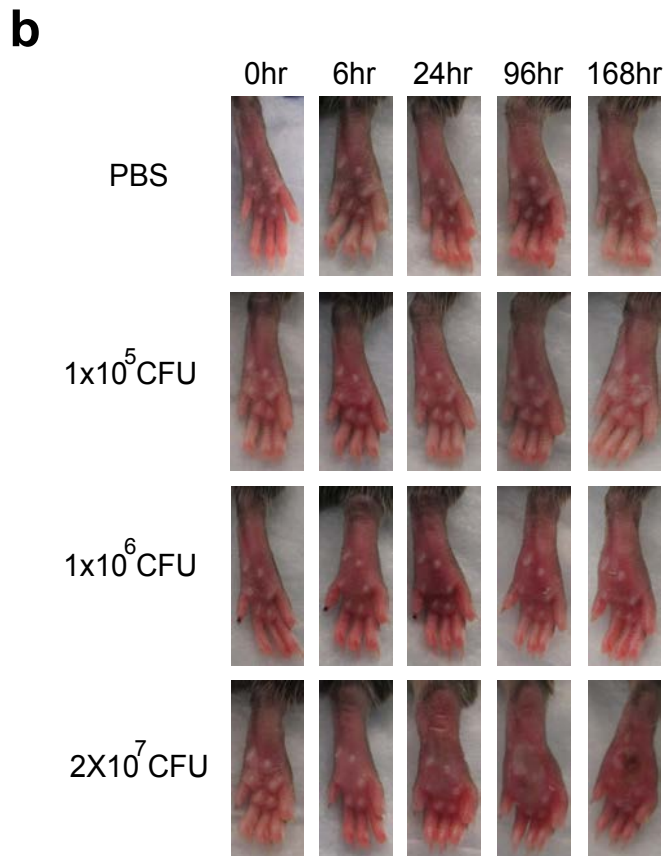

**Supplemental Figure 1. *S. aureus* induced spontaneous pain time course and representative pictures of *S. aureus* infection.** **a.** Spontaneous pain time course in 5-minute intervals produced by *S. aureus* infection (USA300,  $5 \times 10^8$  CFU,  $n=10$  mice/group) vs. Heat-killed (HK) *S. aureus* ( $5 \times 10^8$  CFU),  $n=8$  mice/group and vehicle (PBS),  $n=9$  mice/group.  $N=3$  replicates. Statistical comparison by two-way ANOVA with Tukey's post-test; \*Live *S. aureus* vs PBS; # Live vs HK *S. aureus*. Error bars, mean  $\pm$  s.e.m. \*\*\*  $p < 0.001$ , \*\* $p < 0.01$ , \* $p < 0.05$ . **b.** Representative pictures of time course of infection over 168 hrs by different doses of *S. aureus* (USA300). Of note, the  $2 \times 10^7$  CFU *S. aureus* dose induces tissue necrosis but not lower doses.

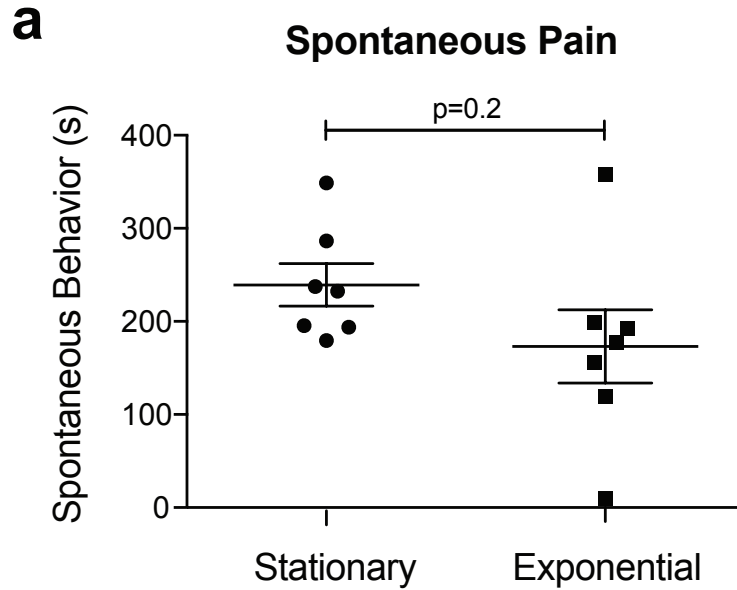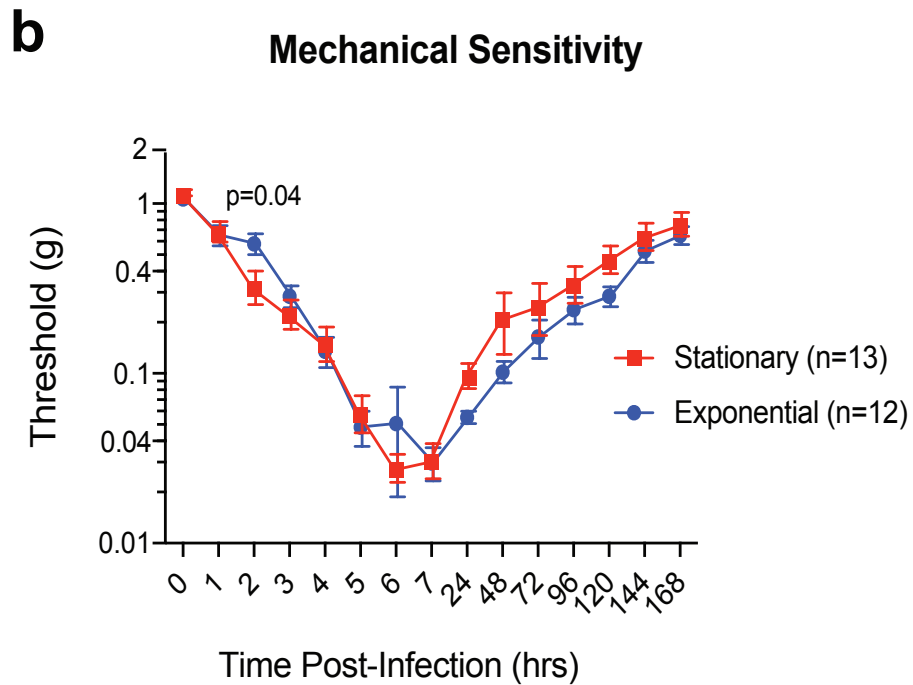

**Supplemental Figure 2. Stationary phase and exponential phase *S. aureus* both induce spontaneous pain and mechanical hyperalgesia.** **a.** Spontaneous pain quantified over 60 minutes after infection with stationary or exponential phase *S. aureus* (USA300,  $5 \times 10^8$  CFU). There is no difference in spontaneous pain behaviors produced by *S. aureus* at different phases of growth.  $n=7$  mice/group.  $N=3$  replicates.  $p$  values, unpaired t-test. **b.** Mechanical sensitivity measured by von Frey hairs after infection with exponential or stationary phase *S. aureus* (USA300,  $1 \times 10^6$  CFU).  $n=12-13$  mice/group.  $N=1$  replicate. Two-way ANOVA, Sidak's post-test. Error bars throughout figure, mean  $\pm$  s.e.m.

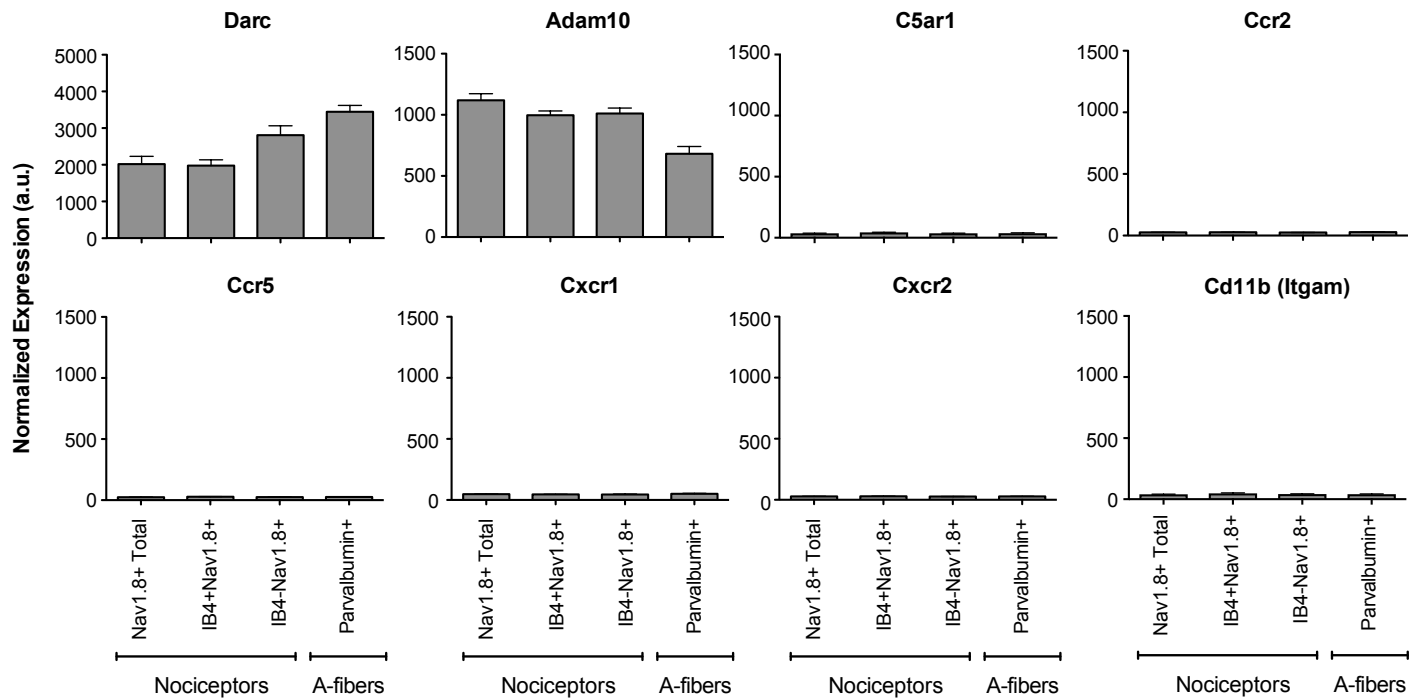

**Supplemental Figure 3. Darc and ADAM10, cellular receptors for pore-forming toxins are expressed by nociceptor neurons.** FACS purified DRG neuron subsets, including total Nav1.8-cre/TdTomato+ nociceptors, the IB4+Nav1.8-cre/TdTomato+ nociceptor subset, the IB4-Nav1.8-cre/TdTomato subset, and Parv-cre/TdTomato+ proprioceptors, were analyzed for gene expression by microarray analysis (For details, see Chiu et al, 2014). RNA-normalized expression levels of known receptors for *S. aureus* pore-forming toxins are plotted (Error, mean+/-s.e.m.) In general, normalized expression values below 100 are considered absent. *Darc*, one of the receptors for HlgAB and LukED, is expressed by DRG neurons, and *Adam10*, the receptor for Hla, is also expressed in nociceptor neurons. By contrast, *C5ar1*, *Ccr2*, *Ccr5*, *Cxcr1*, *Cxcr2*, and *Cd11b (Itgam)* is the gene name), other leukocidin receptors, are not expressed by neurons.

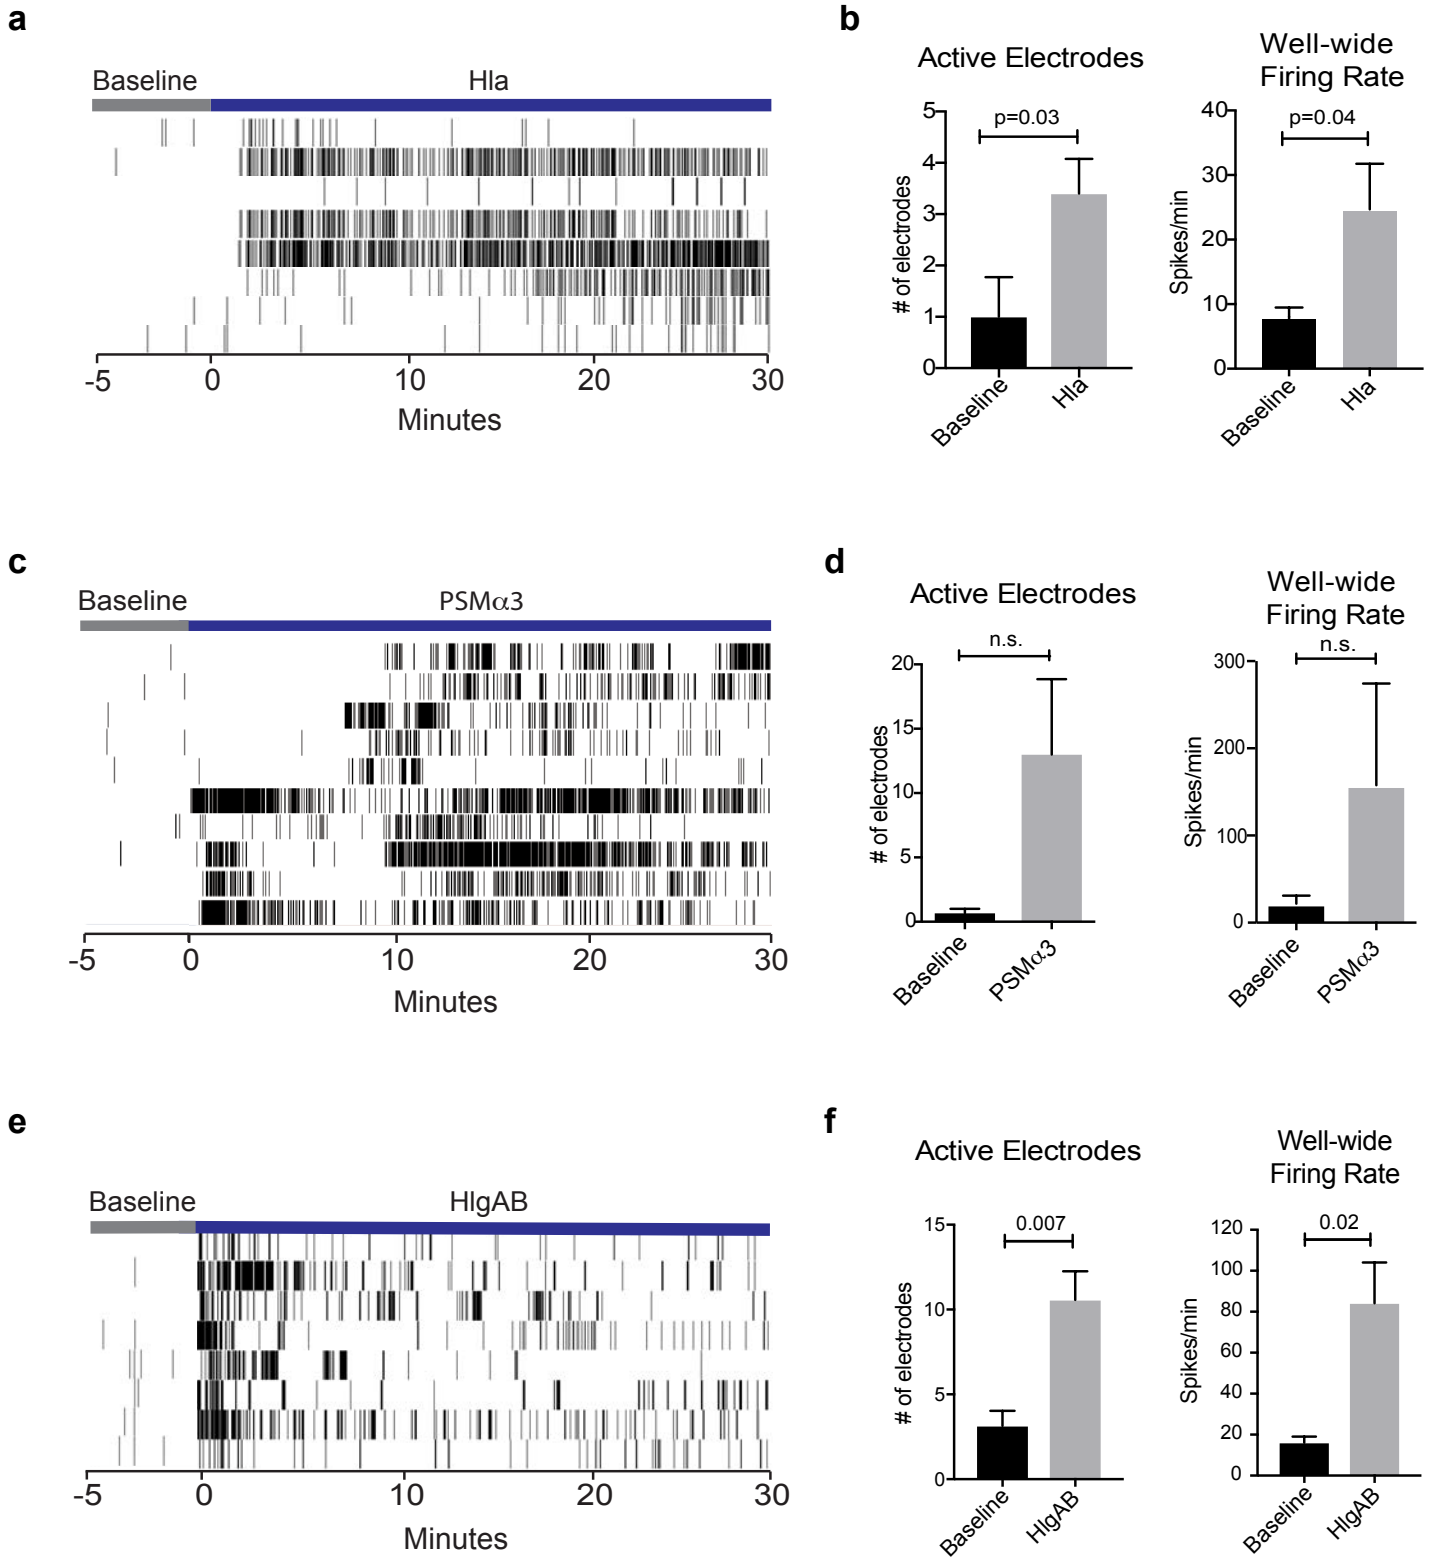

**Supplemental Figure 4. Raster plots and quantification of pore-forming toxin induced neuronal firing.** **a, c, e** Raster plots showing spike activity (vertical lines are individual action potentials) of representative active electrodes from multi-electrode array (MEA) plates treated with pore-forming toxins (PFT), including Hla, PSM $\alpha$ 3, or HlgAB. **b, d, f.** Quantification of DRG neuronal firing before and after indicated PFT addition by measuring the number of active electrodes/plate (>5 spikes/minute) or well-wide firing rate. *p*-values by paired t-test; Hla, 1  $\mu$ M (30  $\mu$ g/mL) or,  $n=17$  electrodes over 5 plates; PSM $\alpha$ 3, 10  $\mu$ M (270  $\mu$ g/mL),  $n=41$  electrodes over 3 plates; HlgAB, 0.1  $\mu$ M (3  $\mu$ g/mL),  $n=74$  electrodes over 7 plates. All experiments done in triplicate. Error bars, mean  $\pm$  s.e.m.

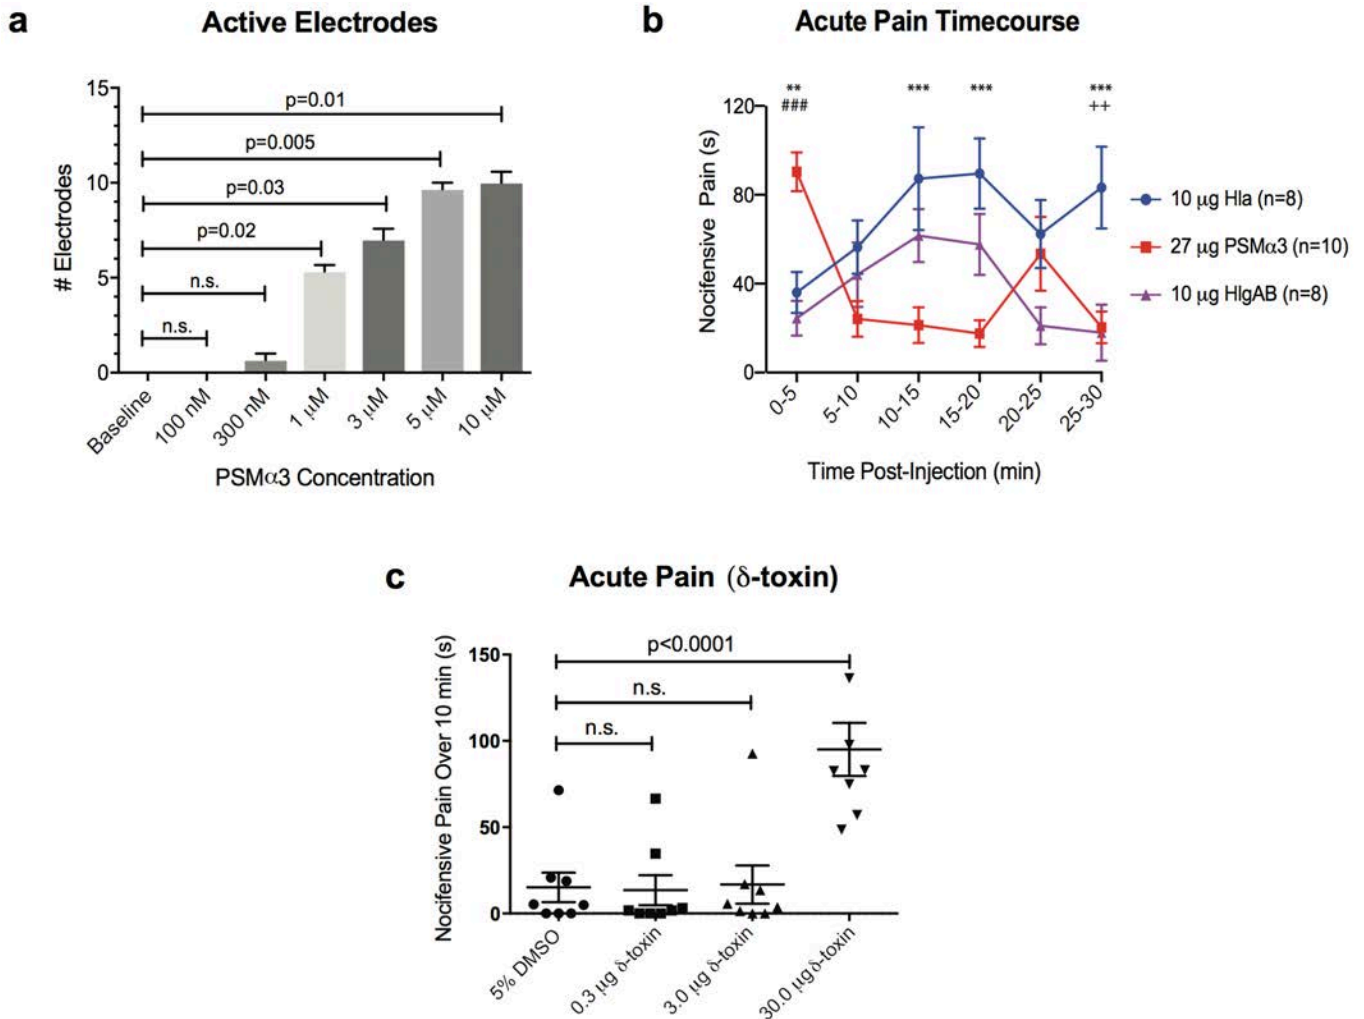

**Supplemental Figure 5. Phenol soluble modulins cause dose-dependent neuronal firing *in vitro* and spontaneous pain *in vivo*.** **a.** Increasing doses of PSM $\alpha$ 3 were added to DRG neurons cultured on MEA plates. An active electrode was defined as 5 spikes/minute or more in any one minute interval (10 minutes total at each dose),  $n=3$  plates.  $N= 2$  replicates. P-values, one-way ANOVA, RM, Tukey's post-test. **b.** Time course of spontaneous pain quantified in five-minute intervals after injection with Hla (10  $\mu$ g, 17  $\mu$ M), PSM $\alpha$ 3 (27  $\mu$ g, 50  $\mu$ M), or HlgAB (10  $\mu$ g, 17  $\mu$ M). PSM $\alpha$ 3 induces immediate spontaneous pain, while HlgAB and Hla spontaneous pain peak around 10 minutes.  $n= 8-10$  mice/group.  $N= 2-3$  replicates per toxin. \*Hla vs PSM $\alpha$ 3 comparison; # HlgAB vs. PSM $\alpha$ 3; + Hla vs HlgAB. \*\*\*\* $p<0.0001$ , \*\*\* $p<0.001$ , \*\* $p<0.01$ , \* $p<0.05$ . **c.** Increasing doses of  $\delta$ -toxin, a member of the PSMs, was injected into mice and spontaneous pain quantified over 10 minutes. (5  $\mu$ M, 50  $\mu$ M, 150  $\mu$ M)  $n=8$  mice/group.  $N= 3$  replicates.  $p$ -values by one-way ANOVA with Tukey's post-tests. Error bars throughout figure, mean  $\pm$  s.e.m.

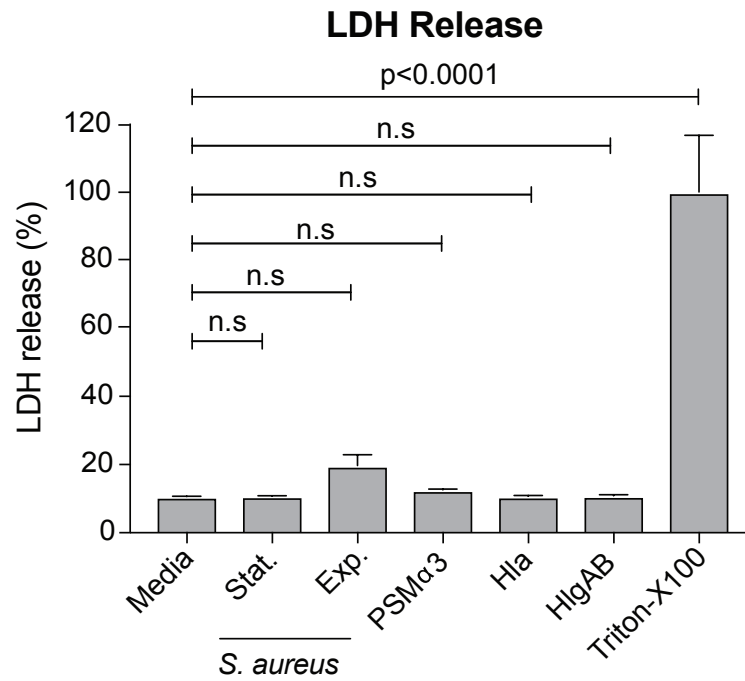

**Supplemental Figure 6. Treatment with pore-forming toxins or live *S. aureus* does not induce significant neuronal lysis at early time points.** LDH release from DRG neurons (5000 cells/well) was measured after 15 minutes of incubation with indicated pore-forming toxins or with stationary (Stat.) or exponential phase (Exp.) *S. aureus* (Concentrations used: 10  $\mu$ M (270  $\mu$ g/mL) PSM $\alpha$ 3; 1  $\mu$ M (30  $\mu$ g/mL) Hla; 0.1  $\mu$ M (3  $\mu$ g/mL) HlgAB;  $1 \times 10^9$  CFU/mL *S. aureus*). Triton-X 100 treated neurons represent 100% lysis.  $n = 3$  wells per condition.  $N = 1$  replicate.  $p$ -values by one-way ANOVA with Tukey's post-tests. Error bars, mean  $\pm$  s.e.m.

## Bacterial Load

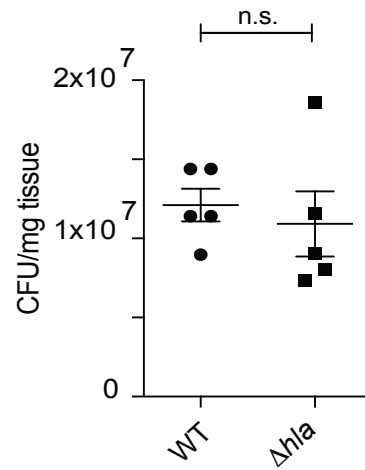

**Supplemental Figure 7. The attenuation of spontaneous pain in the absence of Hla ( $\Delta hla$ ) was not due to decreased bacterial expansion.** Paw tissue was collected, homogenized, and plated after spontaneous pain analysis at the 60-minute time point post-infection by WT or  $\Delta hla$  *S. aureus* (USA300,  $5 \times 10^8$  CFU). Bacterial load recovery was counted and normalized as CFU per mg tissue. Bacterial load did not differ significantly between WT and  $\Delta hla$  *S. aureus* by unpaired t-test.  $n=5$  mice/group.  $N=1$  replicate. Error bars, mean  $\pm$  s.e.m.

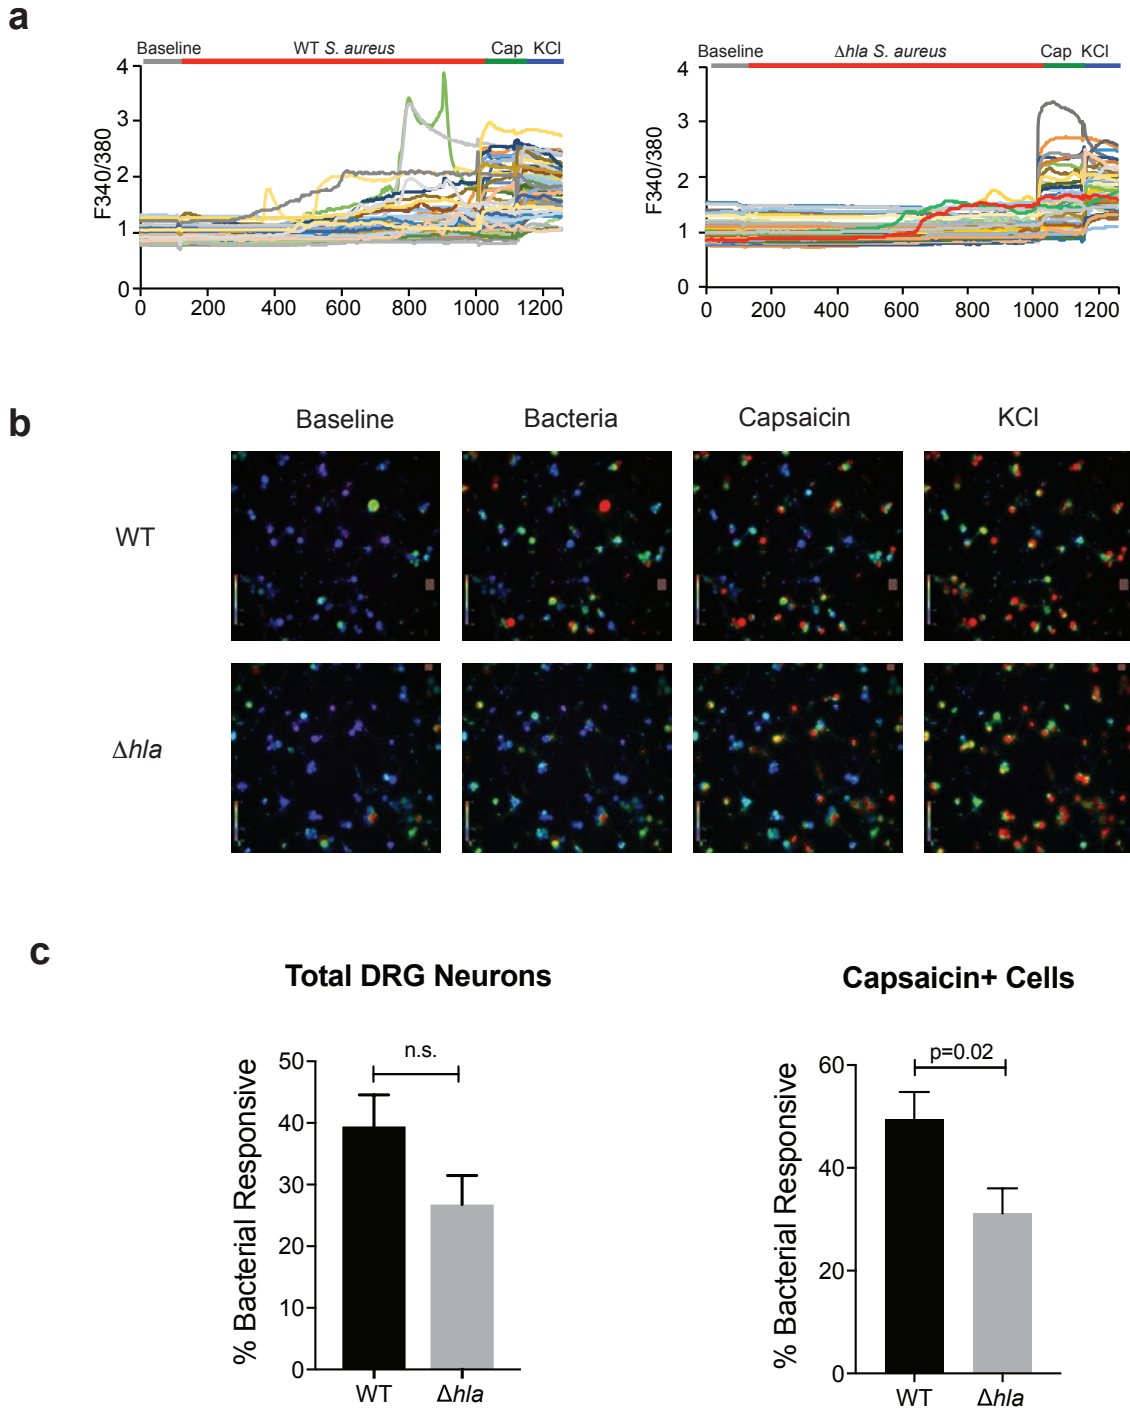

**Supplemental Figure 8. *S. aureus* deficient in  $\alpha$ -hemolysin ( $\Delta hla$ ) shows decreased activation of capsaicin sensitivity nociceptor neurons.** **a.** Representative Fura-2 calcium imaging traces of DRG sensory neurons exposed to live WT or  $\Delta hla$  *S. aureus* (USA300,  $1 \times 10^9$  CFU/mL), followed by capsaicin (1 $\mu$ M), and KCl (40mM). **b.** Representative calcium imaging fields of neurons described in **a.** **c.** Percentage of total neurons (KCl responsive, right) or capsaicin+ neurons (left) responsive to WT or to  $\Delta hla$  *S. aureus*. Percentage of capsaicin+ DRG neurons responsive to  $\Delta hla$  *S. aureus* is decreased compared to WT *S. aureus*. *p*-values by unpaired t-test. *n*=9 fields over 3 separate experiments. Error bars, mean  $\pm$  s.e.m.



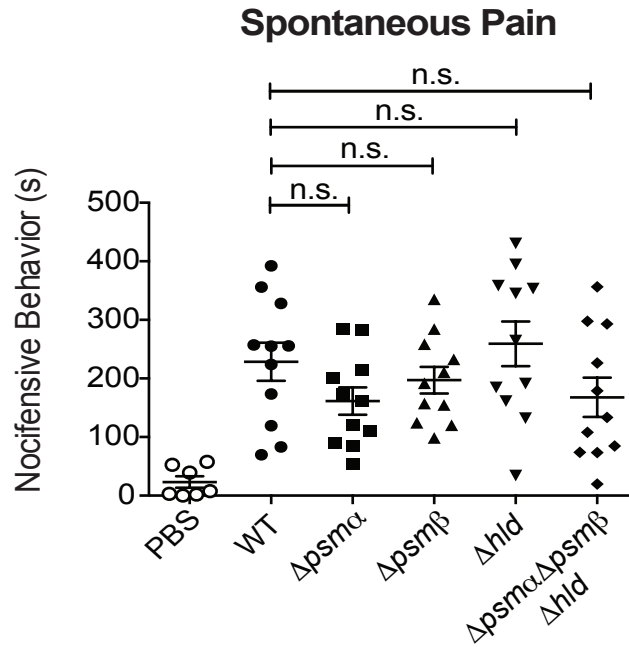

**Supplemental Figure 9. Spontaneous pain during *S. aureus* infection is not due to phenol soluble modulins.** Spontaneous pain was quantified over 60 minutes after infection with WT or specific isogenic mutant strains lacking PSM $\alpha$  ( $\Delta psm\alpha$ ), PSM $\beta$  ( $\Delta psm\beta$ ), delta-toxin ( $\Delta hld$ ), or all PSMs ( $\Delta psm\alpha\Delta psm\beta\Delta hld$ ). There was no statistical difference between each mutant strain and WT *S. aureus*. PBS,  $n=7$  mice/group; *S. aureus* strains,  $n=11$  mice/group.  $N=4$  replicates.  $p$ -values by one-way ANOVA with Tukey's post-tests. Error bars, mean  $\pm$  s.e.m.

**a**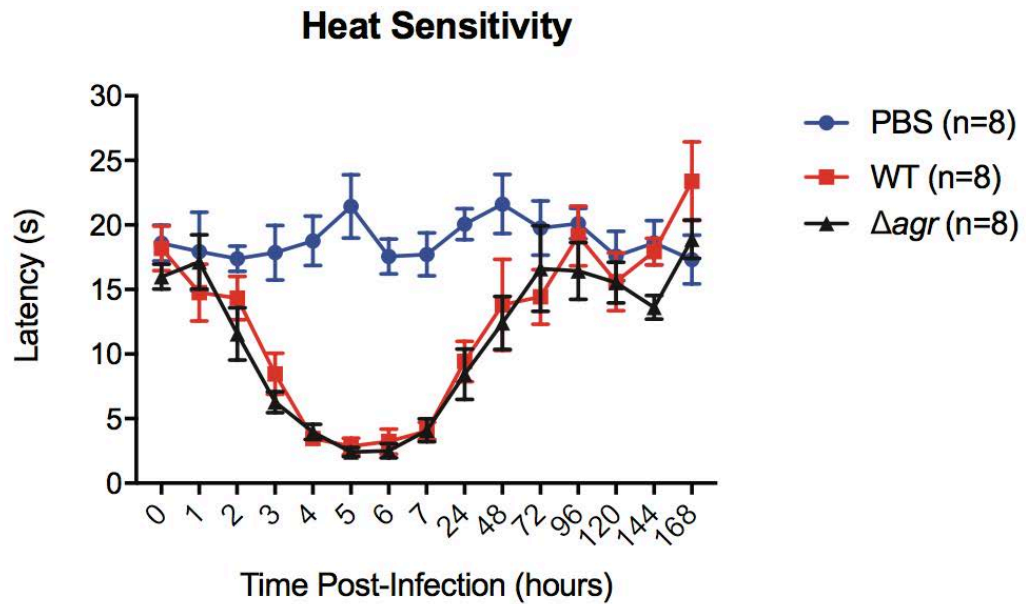**b**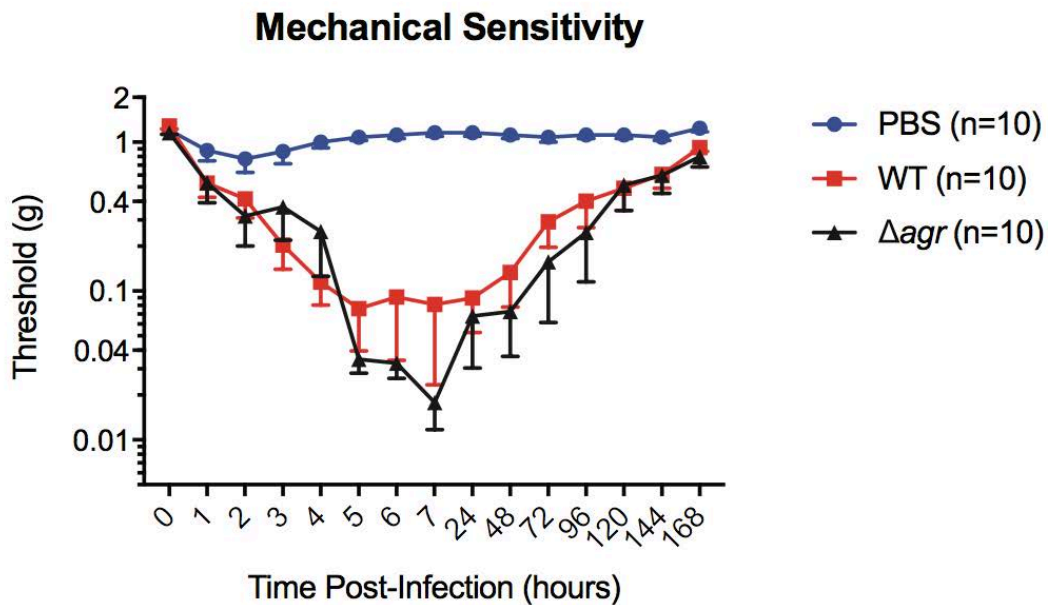

**Supplemental Figure 10. The *S. aureus agr* quorum sensing locus contribute to heat or mechanical sensitivity during infection.** **a, b.** Heat and mechanical sensitivity were assayed after infection with WT or  $\Delta agr$  *S. aureus* (USA300,  $1 \times 10^6$  CFU). *S. aureus* induced mechanical hyperalgesia, measured by von Frey hairs, and thermal hyperalgesia, measured by the Hargreaves' test, was not significantly different at every time point between WT and  $\Delta agr$  bacteria.  $n = 10$  mice/group.  $N = 2$  replicates.  $p$ -values by two-way ANOVA, RM, with Tukey's post-test. Error bars throughout figure, mean  $\pm$  s.e.m.

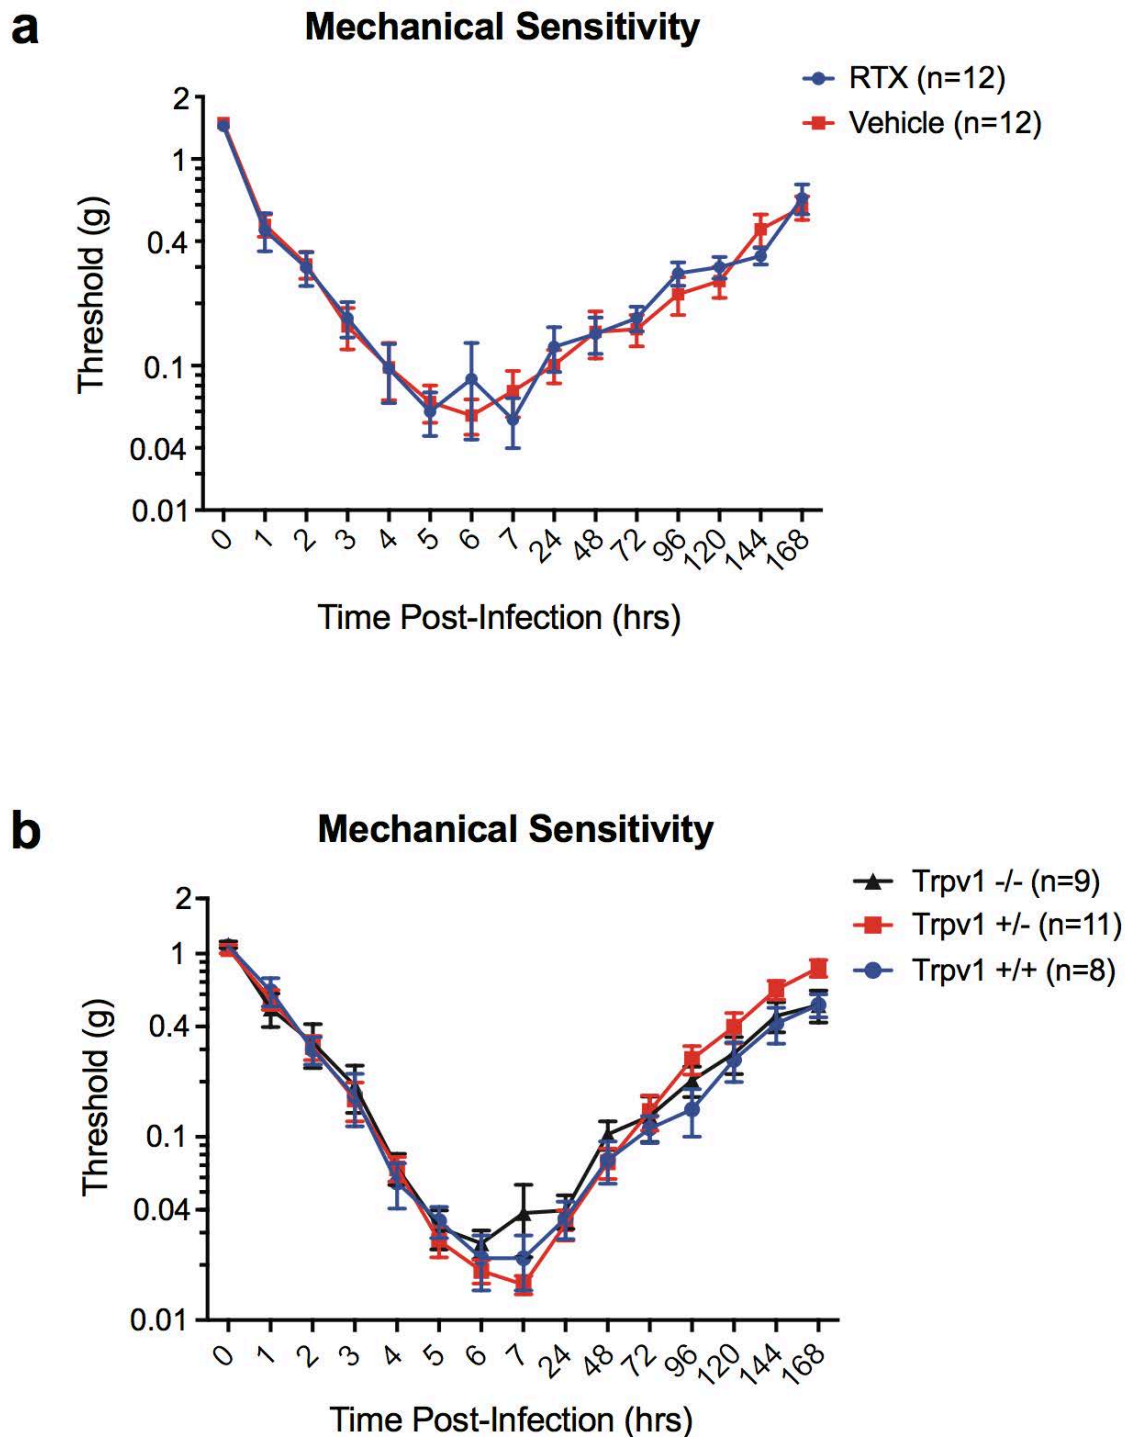

**Supplemental Figure 11. TRPV1 does not mediate mechanical hyperalgesia during *S. aureus* infection.**  
**a.** Mechanical hyperalgesia measured by von Frey hairs in RTX vs. vehicle treated mice following *S. aureus* infection ( $1 \times 10^6$  CFU, USA300). There is no difference in the induction of mechanical hyperalgesia between the groups as determined by two-way ANOVA with Sidak's post-tests.  $n=12$  mice/group.  $N= 2$  replicates. **b.** Mechanical hyperalgesia during *S. aureus* infection in *Trpv1*<sup>-/-</sup> mice compared to infected *Trpv1*<sup>+/-</sup> or *Trpv1*<sup>+/+</sup> littermates. There are no significant differences in the induction of mechanical hyperalgesia between the groups.  $n=8-11$  mice/group.  $N= 3$  replicates.  $p$ -values by two-way ANOVA with Tukey's post-test. \*\*\*\*,  $p < 0.0001$ ; \*\*\*,  $p < 0.001$ ; \*\*,  $p < 0.01$ ; \*,  $p < 0.05$ . Error bars throughout figure, mean  $\pm$  s.e.m.

## Mechanical Sensitivity

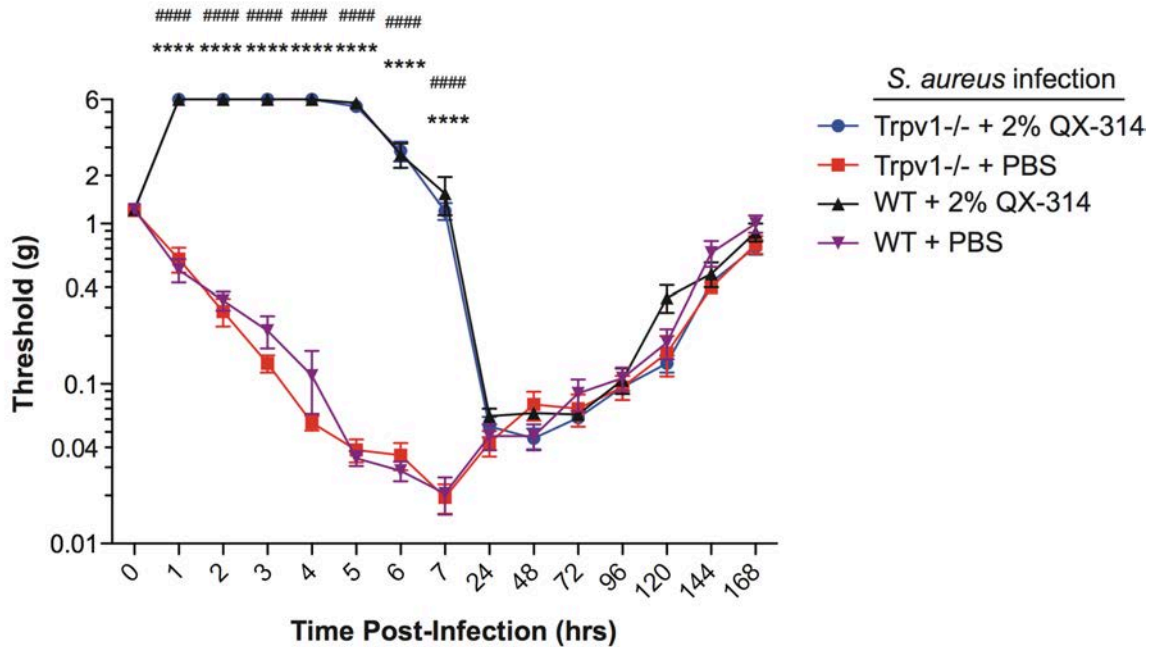

**Supplemental Figure 12. TRPV1 channels are not necessary for QX-314 to block mechanical sensitivity during *S. aureus* infection.** Mechanical sensitivity was measured by von Frey hairs in WT or Trpv1<sup>-/-</sup> mice infected with *S. aureus* (USA300, 1x10<sup>6</sup> CFU) and treated with either 2% QX-314 or PBS. QX-314 significantly decreases mechanical sensitivity in both WT mice and Trpv1<sup>-/-</sup> mice compared to PBS treated mice of the same genotype. \*Trpv1<sup>-/-</sup> mice: PBS treatment vs. 2% QX-314 treatment; #WT mice: PBS treatment vs. 2% QX-314 treatment. *n*=7 mice (3 females and 4 males)/group. *N*=1 replicate. *p*-values by two-way ANOVA, RM, with Tukey's post-test. \*\*\*\* 0.0001 < *p*. Error bars, mean +/- s.e.m.
